# Supplementary material
Source: PubMed Central journal article supplement (PMC6895498)

*Supplemental material is neither peer-reviewed nor thoroughly edited by CJASN. The authors alone are responsible for the accuracy and presentation of the material.*

## **SUPPLEMENTAL MATERIAL TABLE OF CONTENTS**

**Supplemental Table 1.** All diagnostic codes

**Supplemental Table 2.** Geographic region codes

**Supplemental Table 3.** Clinic visit codes

**Supplemental Table 4.** Laboratory codes

**Supplemental Table 5.** Pharmacy codes

**Supplemental Table 6.** Change in prescriptions for stone formers without or with a specific 24-hour urine test.

**Supplemental Table 7.** Number and proportion of each 24-hour urine analyte measured in stone formers with 24-hour urine test

**Supplemental Figure 1:** Thiazide diuretic prescriptions in stone formers without hypertension, before and after 24-hour urine testing, stratified by 24-hour urine calcium.

Supplemental material is neither peer-reviewed nor thoroughly edited by CJASN. The authors alone are responsible for the accuracy and presentation of the material.

**Supplemental Table 1. All diagnostic codes**

| <b>Diagnosis</b>              | <b>ICD-9 Codes</b>                                                                                                                                                                                                                                                                                                                                                                                                                                                                                                                                                                                                                                                                                                                                                                                                                                                                                        |
|-------------------------------|-----------------------------------------------------------------------------------------------------------------------------------------------------------------------------------------------------------------------------------------------------------------------------------------------------------------------------------------------------------------------------------------------------------------------------------------------------------------------------------------------------------------------------------------------------------------------------------------------------------------------------------------------------------------------------------------------------------------------------------------------------------------------------------------------------------------------------------------------------------------------------------------------------------|
| <b>Kidney Stone</b>           | 592.0, 592.1, 592.9, 274.11, 270.0, 271.8, 55.03, 55.04, 55.92, 56.0, 56.2, 59.8, 59.95, 98.51                                                                                                                                                                                                                                                                                                                                                                                                                                                                                                                                                                                                                                                                                                                                                                                                            |
| <b>Hypertension</b>           | 401, 401.0, 401.00, 401.01, 401.02, 401.03, 401.04, 401.05, 401.06, 401.07, 401.08, 401.09, 401.1, 401.10, 401.11, 401.12, 401.13, 401.14, 401.15, 401.16, 401.17, 401.18, 401.19, 401.2, 401.20, 401.21, 401.22, 401.23, 401.24, 401.25, 401.26, 401.27, 401.28, 401.29, 401.3, 401.30, 401.31, 401.32, 401.33, 401.34, 401.35, 401.36, 401.37, 401.38, 401.39, 401.4, 401.40, 401.41, 401.42, 401.43, 401.44, 401.45, 401.46, 401.47, 401.48, 401.49, 401.5, 401.50, 401.51, 401.52, 401.53, 401.54, 401.55, 401.56, 401.57, 401.58, 401.59, 401.6, 401.60, 401.61, 401.62, 401.63, 401.64, 401.65, 401.66, 401.67, 401.68, 401.69, 401.7, 401.70, 401.71, 401.72, 401.73, 401.74, 401.75, 401.76, 401.77, 401.78, 401.79, 401.8, 401.80, 401.81, 401.82, 401.83, 401.84, 401.85, 401.86, 401.87, 401.88, 401.89, 401.9, 401.90, 401.91, 401.92, 401.93, 401.94, 401.95, 401.96, 401.97, 401.98, 401.99 |
| <b>Gout</b>                   | 274.9, 274.89, 274.03, 274.01, 274.00, 274.02                                                                                                                                                                                                                                                                                                                                                                                                                                                                                                                                                                                                                                                                                                                                                                                                                                                             |
|                               | <b>CPT Codes</b>                                                                                                                                                                                                                                                                                                                                                                                                                                                                                                                                                                                                                                                                                                                                                                                                                                                                                          |
| <b>Kidney Stone Procedure</b> | 50060, 50065, 50070, 50075, 50080, 50081, 50130, 50135, 50561, 50580, 50590, 50610, 50620, 50630, 50945, 50961, 50980, 51060, 51065, 52320, 52325, 52330, 52353                                                                                                                                                                                                                                                                                                                                                                                                                                                                                                                                                                                                                                                                                                                                           |

*Supplemental material is neither peer-reviewed nor thoroughly edited by CJASN. The authors alone are responsible for the accuracy and presentation of the material.*

**Supplemental Table 2. Geographic region codes**

---

| <b>Region</b> | <b>Veterans Integrated Service Networks (VISN)</b> |
|---------------|----------------------------------------------------|
| Northeast     | VISN 1: VA New England Healthcare System           |
|               | VISN 2: New York/New Jersey VA Health Care Network |
|               | VISN 4: VA Healthcare - VISN 4                     |
|               | VISN 5: VA Capitol Health Care Network             |
| Southeast     | VISN 6: VA Mid-Atlantic Health Care Network        |
|               | VISN 7: VA Southeast Network                       |
|               | VISN 8: VA Sunshine Healthcare Network             |
|               | VISN 9: VA MidSouth Healthcare Network             |
|               | VISN 10: VA Healthcare System                      |
| Midwest       | VISN 12: VA Great Lakes Health Care System         |
|               | VISN 15: VA Heartland Network                      |
|               | VISN 16: South Central VA Health Care Network      |
|               | VISN 17: VA Heart of Texas Health Care Network     |
| West          | VISN 23: VA Midwest Health Care Network            |
|               | VISN 19: Rocky Mountain Network                    |
|               | VISN 20: Northwest Network                         |
|               | VISN 21: Sierra Pacific Network                    |
|               | VISN 22: Desert Pacific Healthcare Network         |

---

*Supplemental material is neither peer-reviewed nor thoroughly edited by CJASN. The authors alone are responsible for the accuracy and presentation of the material.*

**Supplemental Table 3. Clinic visit codes**

---

|                            | <b>Provider Codes</b>             | <b>Clinic Stop Codes</b> |
|----------------------------|-----------------------------------|--------------------------|
| <b>Nephrology</b>          | 070929, 114212                    | 39, 313                  |
| <b>Urology</b>             | 070951, 118200,<br>118000, 183400 | 414                      |
| <b>Nutrition/Dietitian</b> |                                   | 14, 123, 124, 175, 708   |

---

*Supplemental material is neither peer-reviewed nor thoroughly edited by CJASN. The authors alone are responsible for the accuracy and presentation of the material.*

**Supplemental Table 4. Laboratory codes**

---

**24-hour urine**

| <b>analyte</b> | <b>LOIN-C Code</b>                                                                                              |
|----------------|-----------------------------------------------------------------------------------------------------------------|
| Calcium        | 6874-2, 14637-3, 18488-7, 25362-6,<br>35248-4, 40999-5, 42673-4, 81623-1,<br>38251-5, 34736-9, 13717-4, 50839-0 |
| Oxalate        | 27222-9, 2701-1, 34349-1, 13788-5                                                                               |
| Citrate        | 6687-8, 21203-5, 14650-6, 25876-4,<br>44306-9                                                                   |
| Sulfate        | 12920-5, 26888-8, 26889-6, 39576-4,<br>62489-0                                                                  |
| Uric acid      | 14935-1, 21587-1, 25997-8, 3087-4,<br>35253-4                                                                   |

---

*Supplemental material is neither peer-reviewed nor thoroughly edited by CJASN. The authors alone are responsible for the accuracy and presentation of the material.*

**Supplemental Table 5. Pharmacy codes**

---

| <b>Drug name</b>      | <b>VA Class Code</b> |
|-----------------------|----------------------|
| Hydrochlorothiazide   | CV701                |
| Chlorthalidone        | CV701                |
| Indapamide            | CV701                |
| Potassium citrate     | TN478, GU900, TN430  |
| Sodium bicarbonate    | GA110, TN476, RE900  |
| Sodium Citrate        | TN440, TN478         |
| Potassium bicarbonate | GA110, TN430         |
| Allopurinol           | MS400                |

---

Supplemental material is neither peer-reviewed nor thoroughly edited by CJASN. The authors alone are responsible for the accuracy and presentation of the material.

**Supplemental Table 6. Change in prescriptions for stone formers without or with 24-hour urine test**

|                                        | <b>Without 24-hour urine test<br/>N=113,186</b> | <b>With 24-hour urine calcium<br/>N=16,202</b> | <b>p -value</b> |
|----------------------------------------|-------------------------------------------------|------------------------------------------------|-----------------|
| <b>Thiazides (N, %)</b>                | 19,372 (17%)                                    | 3912 (24%)                                     | <0.001          |
| <b>Thiazides (% absolute change)</b>   | 0.2%                                            | 8%                                             | <0.001          |
|                                        | <b>Without 24-hour urine test<br/>N=113,186</b> | <b>With 24-hour urine citrate<br/>N=13,089</b> | <b>p -value</b> |
| <b>Alkali (N, %)</b>                   | 4882 (4%)                                       | 2291 (18%)                                     | <0.001          |
| <b>Alkali (% absolute change)</b>      | 3%                                              | 15%                                            | <0.001          |
|                                        | <b>Without 24-hour urine test<br/>N=113,186</b> | <b>With 24-hour urine uric acid<br/>N=4213</b> | <b>p -value</b> |
| <b>Allopurinol (N, %)</b>              | 7511 (7%)                                       | 487 (12%)                                      | <0.001          |
| <b>Allopurinol (% absolute change)</b> | 1%                                              | 7%                                             | <0.001          |

*Supplemental material is neither peer-reviewed nor thoroughly edited by CJASN. The authors alone are responsible for the accuracy and presentation of the material.*

**Supplemental Table 7. Number and proportion of each 24-hour urine analyte measured in stone formers with 24-hour urine test**

| <b>24-hour urine analyte</b> | <b><i>N</i></b> | <b>% of stone formers with 24-hour urine test</b> |
|------------------------------|-----------------|---------------------------------------------------|
| Calcium                      | 16,202          | 94                                                |
| Citrate                      | 13,089          | 76                                                |
| Oxalate                      | 12,528          | 72                                                |
| Sulfate                      | 3530            | 20                                                |
| Uric Acid                    | 4213            | 24                                                |



**Supplemental Figure 1**

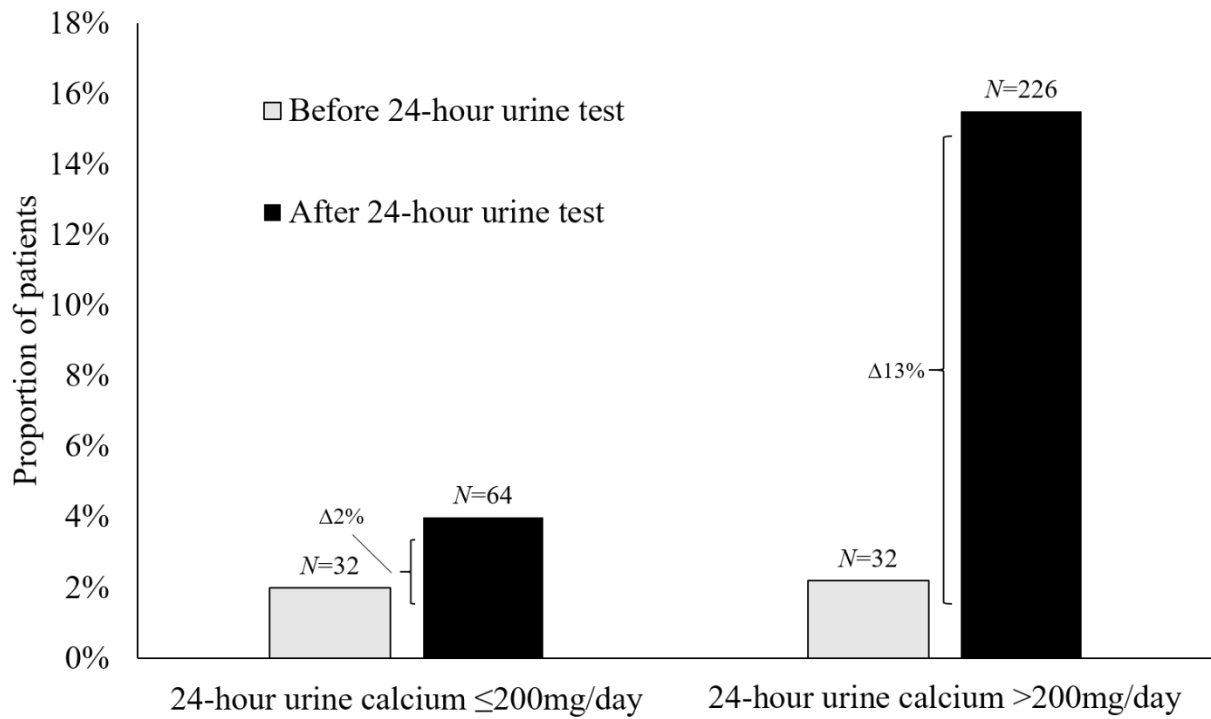

Supplement: CJN.03580319SupplementaryData.pdf [file CJN.03580319SupplementaryData.pdf]
